# Supplementary material for: An oPD-CD doped zirconium-based metal–organic frame composite fluorescence probe for efficient and selective detection of nitric oxide
Source: Royal Society of Chemistry journal article supplement (doi:10.1039/d3nj01465g), 2023-01-01
Supplement: d3nj01465g1.pdf [file d3nj01465g1.pdf]

## Electronic Supplementary Information

# **oPD-CDs doped zirconium-based metal-organic frame composite fluorescence probe for the efficient and selective detection of nitric oxide**

Botao zhang<sup>a</sup>, Liyun Ding<sup>a,b\*</sup>, Yumei Zhang<sup>a</sup>, Shiyuan Wang<sup>b</sup>,  
Xingdong Jiang<sup>b</sup>, Fei Ma<sup>b</sup>, Jue Zhao<sup>b</sup>

<sup>a</sup> The National Engineering Research Center of Fiber Optic Sensing Technology and Network, Wuhan University of Technology, Wuhan 430070, China.

<sup>b</sup> School of Physical Science and Technology, Lanzhou University, Lanzhou 730000, China. E-mail address: dingly@lzu.edu.cn

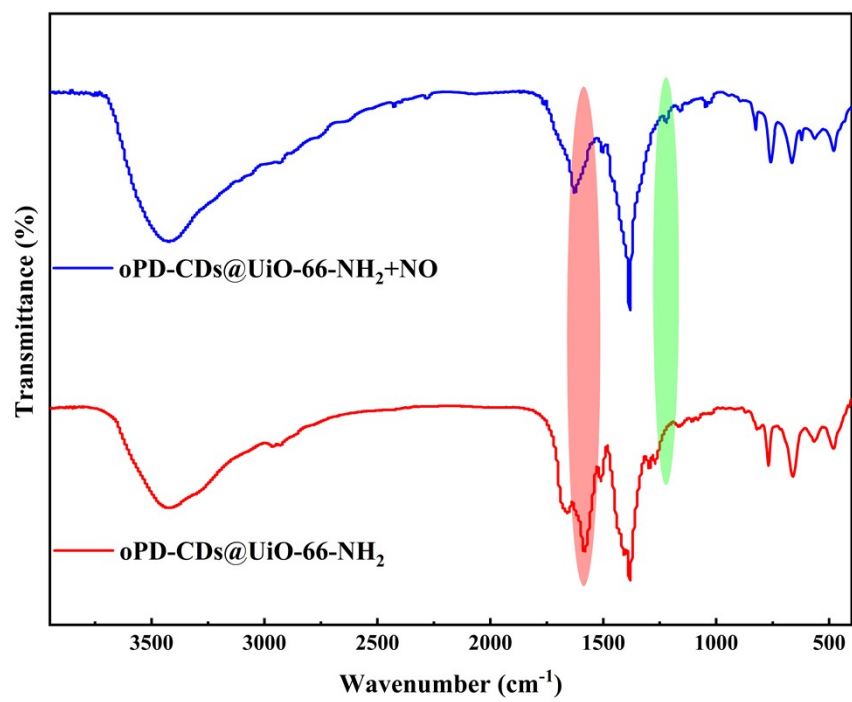

**Fig. S1** FTIR spectra of  $\text{oPD@UiO-66-NH}_2$  before and after reaction with NO.

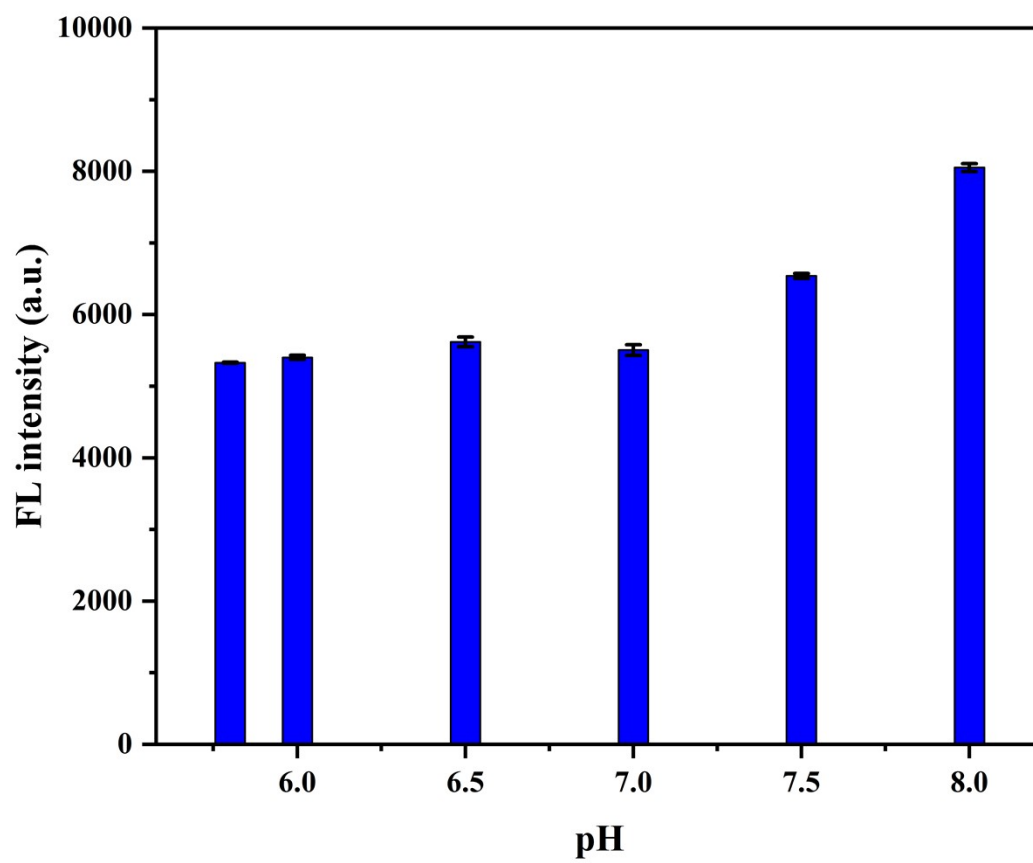

**Fig. S2** Effect of pH on the stability of fluorescence probes.

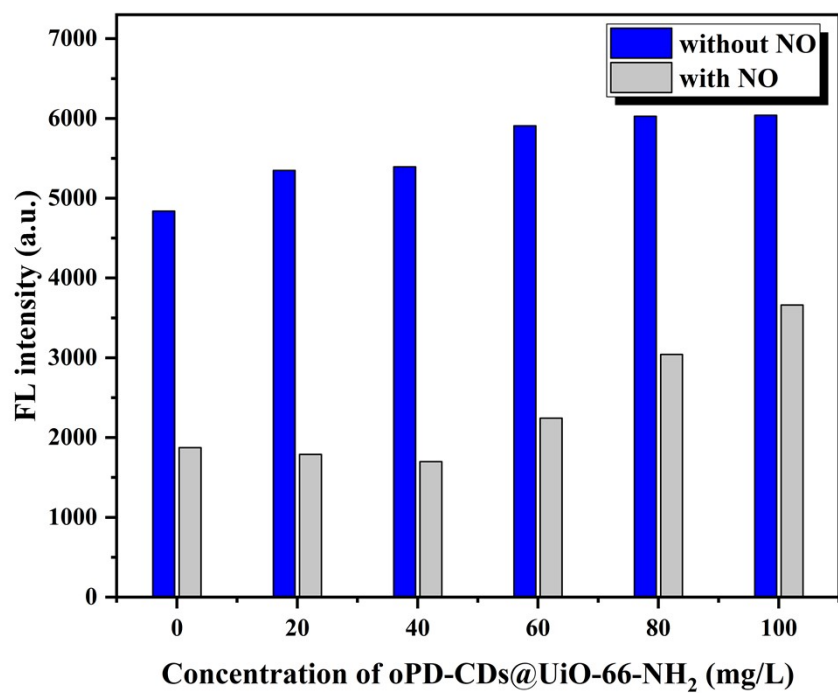

**Fig. S3** Fluorescence response of various concentrations of oPD@UiO-66-NH<sub>2</sub> at 500 $\mu$ M NO.
